# Supplementary material for: Facile design of a WO3 nanorod-decorated graphene oxide 1D–2D nanocatalyst for the synthesis of quinoline and its derivatives
Source: Royal Society of Chemistry journal article supplement (doi:10.1039/d1nj05681f), 2022-01-01
Supplement: d1nj05681f1.pdf [file d1nj05681f1.pdf]

### Supplementary Information

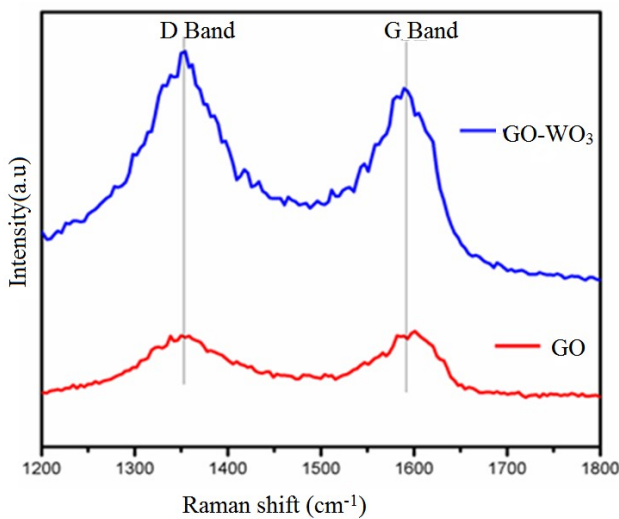

Fig.S1. FT-RAMAN spectra of GO and 20wt % loaded WO<sub>3</sub> with GO.

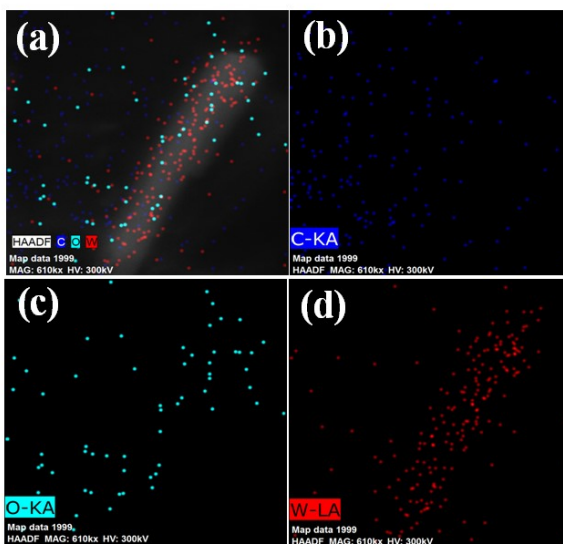

Fig.S2. Elemental mapping of prepared catalyst GO-WO<sub>3</sub> (a) HAADF image of C, O, W (b) C, (c) O and (d) W.

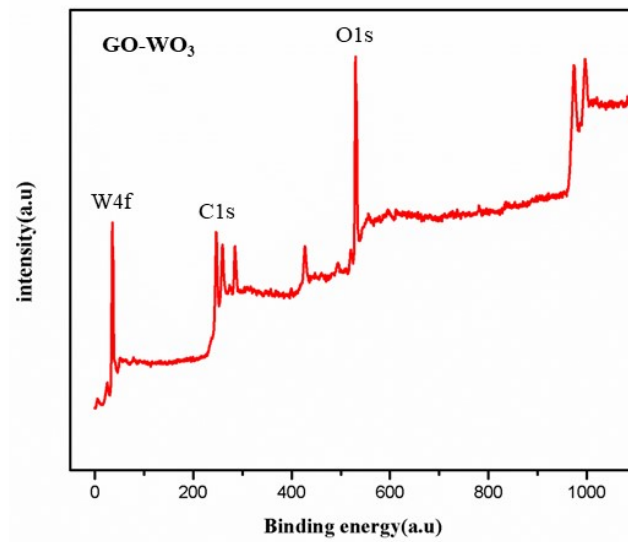

Fig.S3. Survey scan study of optimized GO-WO<sub>3</sub> catalyst.

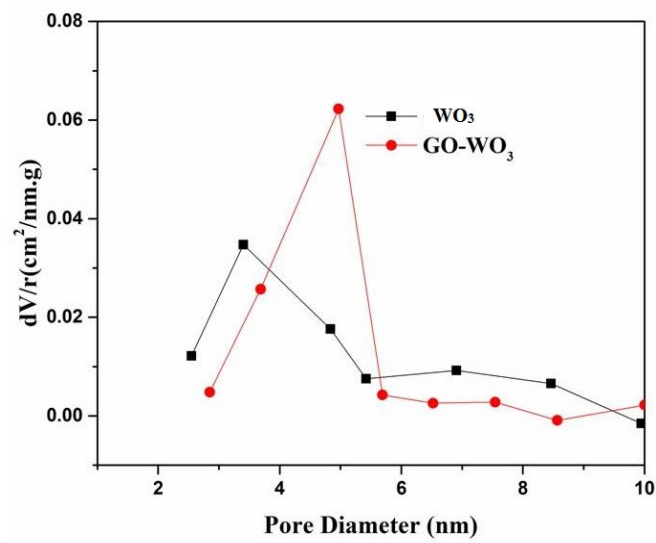

Fig.S4. shows the pore size distribution curve of WO<sub>3</sub> and GO-WO<sub>3</sub>.

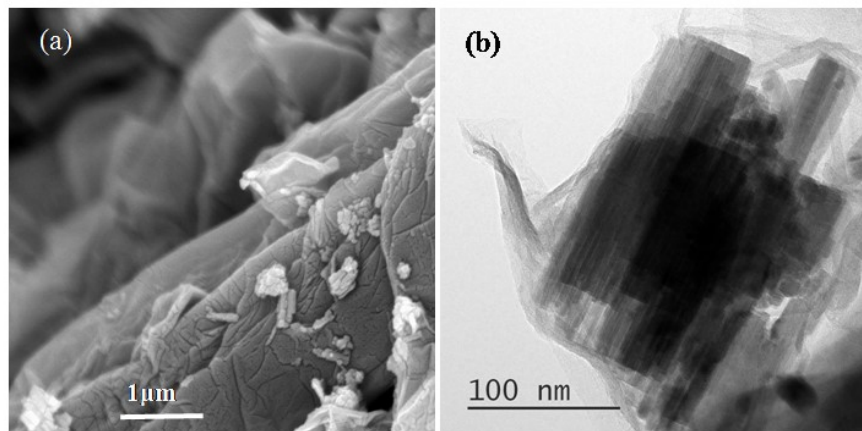

Fig.S5. FESEM image (a) and TEM image (b) of catalyst GO-WO<sub>3</sub> after 5<sup>th</sup> cycles

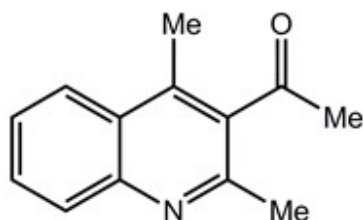

**1-(2,4 dimethyl quinoline-3-yl) Ethanone** was synthesized by general procedure (mentioned in manuscript) and was purified by solvent system ethyl acetate : hexane (2 : 98, R<sub>f</sub>= 0.5) and Melting point(Mp) =114-115 °C, ( 8mg, 87% yield), <sup>1</sup>H NMR (400 MHz, DMSO-d<sub>6</sub>): δ in ppm =1.40 (3H, t, J 7.1 Hz, CH<sub>3</sub>), 2.57 (3H, s, CH<sub>3</sub>), 2.68 (3H, s,CH<sub>3</sub>), 7.46–7.51 (1H, m, CH), 7.62–7.65 (1H, m, CH),. 7.91 (1H, d, J 8.0 Hz, CH), 7.98 (1H, d, J 8.0 Hz, C-CH); <sup>13</sup>C NMR (100 MHz, DMSO-d<sub>6</sub>): δ in ppm = 14.0, 19.8, 22.4, 124.0, 125.3, 126.0, 128.1, 131.1, 144.7, 147.9, 158.6, 165.5.

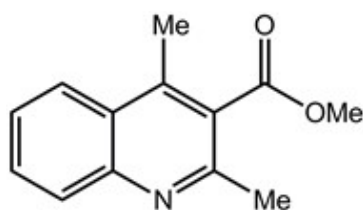

**Methyl 2,4-dimethyl quinoline-3-carboxylate** was synthesized by general procedure (mentioned in manuscript) and was purified by solvent system ethyl acetate : hexane (2 : 98,  $R_f = 0.45$ ) and Melting point(Mp) = 95 °C, (10mg, 91% yield),  $^1\text{H NMR}$  (400 MHz, DMSO- $d_6$ ):  $\delta$  in ppm = 1.40 (3H, t, J 7.1 Hz,  $\text{CH}_3$ ), 2.57 (3H, s,  $\text{CH}_3$ ), 4.42 (3H, s,  $\text{OCH}_3$ ), 7.46–7.51 (1H, m, CH), 7.62–7.65 (1H, m, CH), 7.91 (1H, d, J 8.0 Hz, CH), 7.98 (1H, d, J 8.0 Hz, C-CH);  $^{13}\text{C NMR}$  (100 MHz, DMSO- $d_6$ ):  $\delta$  in ppm = 14.0, 19.8, 49.4, 124.0, 125.3, 126.0, 128.1, 131.1, 144.7, 147.9, 158.6, 165.5.

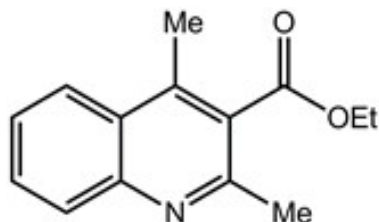

**Ethyl 2,4-dimethyl quinoline-3-carboxylate** was synthesized by general procedure (mentioned in manuscript) and was purified by solvent system ethyl acetate : hexane (3 : 97,  $R_f = 0.45$ ) and Melting point(Mp) = 97°C, (11mg, 92% yield),  $^1\text{H NMR}$  (400 MHz, DMSO- $d_6$ ):  $\delta$  in ppm = 1.40 (3H, t, J 7.1 Hz,  $\text{CH}_3$ ), 2.57 (3H, s,  $\text{CH}_3$ ), 4.42 (3H, s,  $\text{OCH}_2$ ), 2.68 (3H, s,  $\text{CH}_3$ ), 7.46–7.51 (1H, m, CH), 7.62–7.65 (1H, m, CH), 7.91 (1H, d, J 8.0 Hz, CH), 7.98 (1H, d, J 8.0 Hz, C-CH);  $^{13}\text{C NMR}$  (100 MHz, DMSO- $d_6$ ):  $\delta$  in ppm = 14.0, 19.8, 49.4, 66.1, 124.0, 125.3, 126.0, 128.1, 131.1, 144.7, 147.9, 158.6, 165.5.

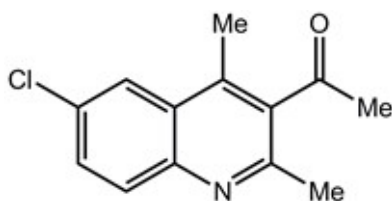

**1-(6-chloro-2,4-dimethyl quinoline-3-yl) ethanone** was synthesized by general procedure (mentioned in manuscript) and was purified by solvent system ethyl acetate : hexane (3 : 97,  $R_f = 0.5$ ) Melting point(Mp) = 112-115 °C. (7mg, 88% yield),  $^1\text{H NMR}$  (400 MHz, DMSO- $d_6$ ):  $\delta$  in ppm = 1.40 (3H, t, J 7.1 Hz,  $\text{CH}_3$ ), 2.57 (3H, s,  $\text{CH}_3$ ), 2.68 (3H, s,  $\text{CH}_3$ ), 7.66–7.51 (1H, m, CH), 7.82–7.65 (1H, m, CH), 7.98 (1H, d, J 8.0 Hz, CH), 8.10 (1H, d, J 8.0 Hz, C-CH);  $^{13}\text{C NMR}$  (100 MHz, DMSO- $d_6$ ):  $\delta$  in ppm = 14.0, 19.8, 22.4, 124.0, 125.3, 136.0, 138.1, 151.1, 164.7, 147.9, 158.6, 175.5.

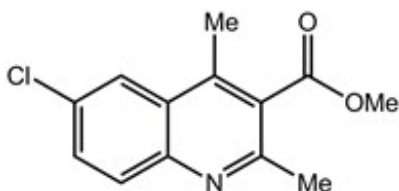

**1-(6-chloro-2,4-dimethyl quinoline-3-carboxylate)** was synthesized by general procedure (mentioned in manuscript) and was purified by solvent system ethyl acetate : hexane (2 : 98,  $R_f = 0.5$ ) Melting point(Mp) = 101 °C. (9mg, 91% yield),  $^1\text{H NMR}$  (400 MHz, DMSO- $d_6$ ):  $\delta$  in ppm = 1.40 (3H, t, J 7.1 Hz,  $\text{CH}_3$ ), 2.57 (3H, s,  $\text{CH}_3$ ), 4.42 (3H, s,  $\text{OCH}_3$ ), 7.46–7.51 (1H, m, CH), 7.72–7.65 (1H, m, CH), 7.98 (1H, d, J 8.0 Hz, CH), 8.10 (1H, d, J 8.0 Hz, C-CH);  $^{13}\text{C NMR}$  (100 MHz, DMSO- $d_6$ ):  $\delta$  in ppm = 14.0, 19.8, 49.4, 124.0, 125.3, 136.0, 138.1, 141.1, 164.7, 157.9, 168.6, 175.5.

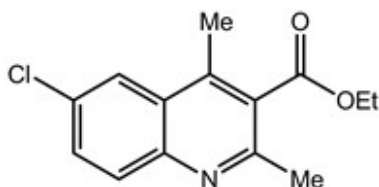

**Ethyl 7-chloro-1,3 dimethyl 2-naphthoate** was synthesized by general procedure (mentioned in manuscript) and was purified by solvent system ethyl acetate : hexane (2 : 98,  $R_f$  = 0.5)) and Melting point(Mp) = 102-104 °C an oil. (8.5mg, 90% yield)  $^1\text{H}$  NMR (400 MHz, DMSO- $d_6$ ):  $\delta$  in ppm = 1.40 (3H, t, J 7.1 Hz, CH<sub>3</sub>), 2.57 (3H, s, CH<sub>3</sub>), 4.42 (3H, s, OCH<sub>2</sub>), 2.68 (3H, s, CH<sub>3</sub>) 7.56–7.61 (1H, m, CH), 7.72–7.75 (1H, m, CH), 7.98 (1H, d, J 8.0 Hz, CH), 8.10 (1H, d, J 8.0 Hz, C-CH);  $^{13}\text{C}$  NMR (100 MHz, DMSO- $d_6$ ):  $\delta$  in ppm = 14.0, 19.8, 49.4, 66.1 134.0, 135.3, 136.0, 128.1, 141.1, 164.7, 157.9, 168.6, 175.5.

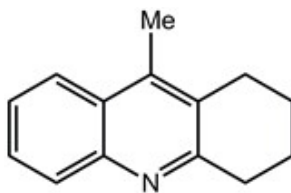

**9-methyl 1,2,3,4 tetrahydroacridine** was synthesized by general procedure (mentioned in manuscript) and was purified by solvent system ethyl acetate: hexane (2 : 98,  $R_f$  = 0.4)) and Melting point(Mp) = 138-141 °C. (13 mg, 94% yield),  $^1\text{H}$  NMR (400 MHz, DMSO- $d_6$ ):  $\delta$  in ppm = 1.83–1.89 (4H, m, CH<sub>2</sub>), 2.29 (3H, s, CH<sub>3</sub>), 2.61 2.64 (2H, m, C-CH<sub>2</sub>), 2.79–2.83 (2H, m, N-C-CH<sub>2</sub>), 7.48–7.52 (1H, m, CH), 7.59–7.63 (1H, m, CH), 7.89 (1H, d, J 8.1 Hz, CH), 8.31 (1H, d, J 8.1 Hz, CH);  $^{13}\text{C}$  NMR (100 MHz, DMSO- $d_6$ ):  $\delta$  in ppm = 21.1, 22.5, 23.6, 33.8, 35.9, 122.8, 125.4, 128.2, 127.7, 132.9, 140.5, 144.9, 165.0.

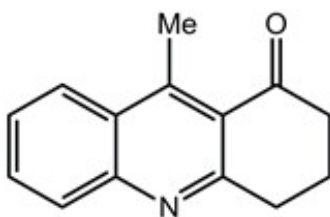

**9-methyl 3,4 dihydro acridine-1(2H) one** was synthesized by general procedure (mentioned in manuscript) and was purified by solvent system ethyl acetate: hexane (3 : 97,  $R_f$  = 0.5)) and Melting point(Mp) = 151-153 °C. (18 mg, 96% yield),  $^1\text{H}$  NMR (400 MHz, DMSO- $d_6$ ):  $\delta$  in ppm = 2.83–2.89 (2H, m, CH<sub>2</sub>), 2.29 (3H, s, CH<sub>3</sub>), 2.61 2.64 (2H, m, C-CH<sub>2</sub>), 2.79–2.83 (2H, m, N-C-CH<sub>2</sub>), 7.48–7.52 (1H, m, CH), 7.59–7.63 (1H, m, CH), 7.89 (1H, d, J 8.1 Hz, CH), 8.31 (1H, d, J 8.1 Hz, CH);  $^{13}\text{C}$  NMR (100 MHz, DMSO- $d_6$ ):  $\delta$  in ppm = 21.1, 22.5, 23.6, 33.8, 35.9, 122.8, 125.4, 128.2, 127.7, 132.9, 140.5, 144.9, 165.0.

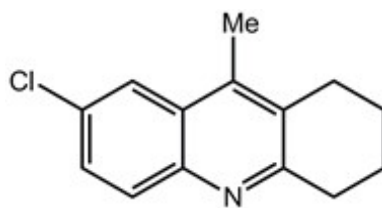

**7-chloro, 9-methyl 1,2,3,4 dihydro acridine** was synthesized by general procedure (mentioned in manuscript) and was purified by solvent system ethyl acetate: hexane (2 : 98,  $R_f = 0.5$ ) and Melting point(Mp) = 159 °C. (8 mg, 89% yield),  $^1\text{H}$  NMR (400 MHz, DMSO- $d_6$ ):  $\delta$  in ppm = 1.83–1.89 (4H,m,CH<sub>2</sub>), 2.29 (3H, s, CH<sub>3</sub>), 2.61 2.64 (2H, m, C-CH<sub>2</sub>), 2.79–2.83 (2H, m, N-C-CH<sub>2</sub>), 7.58–7.62 (1H,m, CH), 7.69–7.83 (1H,m, CH), 7.89–8.012 (1H, d, J 8.1 Hz, CH), 8.31–8.51 (1H, d, J 8.1 Hz, CH);  $^{13}\text{C}$  NMR (100 MHz, DMSO- $d_6$ ):  $\delta$  in ppm = 21.1, 22.5, 23.6, 33.8, 35.9, 132.8, 143.4, 148.2, 137.7, 151.9, 150.5, 154.9, 175.0.

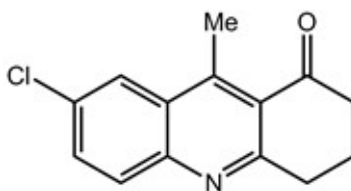

**7-chloro, 9-methyl 3,4 dihydro acridine-1(2H)one** was synthesized by general procedure (mentioned in manuscript) and was purified by solvent system ethyl acetate: hexane (2 : 98,  $R_f = 0.45$ ) and Melting point(Mp) = 163 °C. (14 mg, 92% yield),  $^1\text{H}$  NMR (400 MHz, DMSO- $d_6$ ):  $\delta$  in ppm = 2.83–2.89 (2H,m,CH<sub>2</sub>), 2.29 (3H, s, CH<sub>3</sub>), 2.61 2.64 (2H, m, C-CH<sub>2</sub>), 2.79–2.83 (2H, m, N-C-CH<sub>2</sub>), 7.58–7.72 (1H,m, CH), 7.69–7.83 (1H,m, CH), 7.89–8.10 (1H, d, J 8.1 Hz, CH), 8.31–8.55 (1H, d, J 8.1 Hz, CH);  $^{13}\text{C}$  NMR (100 MHz, DMSO- $d_6$ ):  $\delta$  in ppm = 21.1, 22.5, 23.6, 33.8, 35.9, 132.8, 145.4, 148.2, 133.7, 148.9, 150.5, 164.9, 175.0.
